# Supplementary material for: Effect of Manganese Alloying on Infrared Detectors Made of Pb1−xMnxTe/CdTe Multilayer Composite
Source: MDPI journal article supplement (doi:10.3390/ma16124211), 2023-06-06
Supplement: s1 [file s1]

## *Supplementary Information*

### **Effect of Manganese Alloying on Infrared Detectors Made of $\text{Pb}_{1-x}\text{Mn}_x\text{Te}/\text{CdTe}$ Multilayer Composite**

Sergij Chusnutdinow <sup>1,2,\*</sup>, Alexander Kazakov <sup>2</sup>, Rafał Jakiela <sup>1</sup>, Michał Szot <sup>1,2</sup>, Steffen Schreyeck <sup>3</sup>,  
Karl Brunner <sup>3</sup> and Grzegorz Karczewski <sup>1</sup>

<sup>1</sup> Institute of Physics, Polish Academy of Sciences, aleja Lotników 32/46, 02-668 Warsaw, Poland; jakiela@ifpan.edu.pl (R.J.); szot@ifpan.edu.pl (M.S.); karcz@ifpan.edu.pl (G.K.)

<sup>2</sup> International Research Center MagTop, Institute of Physics, Polish Academy of Sciences, aleja Lotników 32/46, 02-668 Warsaw, Poland; kazakov@magtop.ifpan.edu.pl

<sup>3</sup> Physikalisches Institut, Experimentelle Physik III, Universität Würzburg, D-97074 Würzburg, Germany; steffen.schreyeck@physik.uni-wuerzburg.de (S.S.); brunner@physik.uni-wuerzburg.de (K.B.)

\* Correspondence: chusnut@ifpan.edu.pl

#### **Figure**

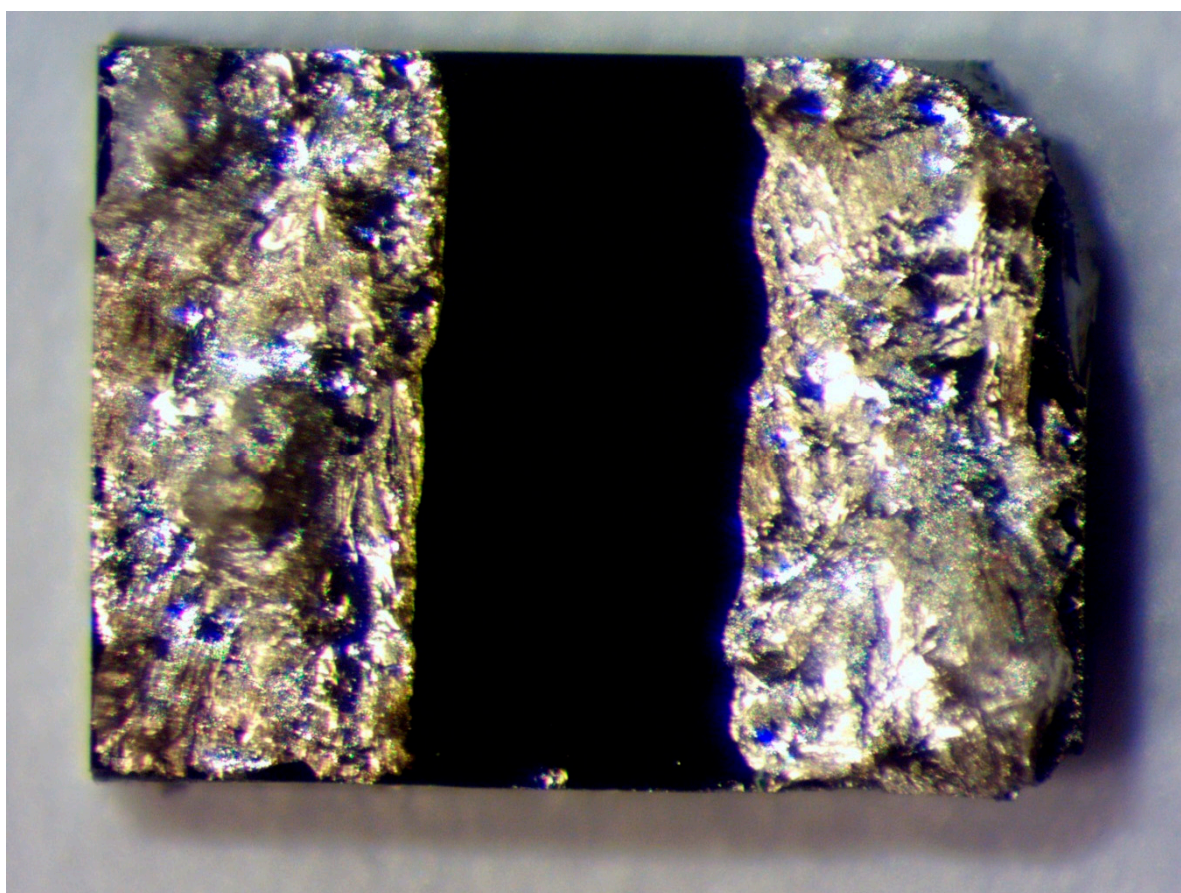

**Figure S1.** Picture of the fabricated typical photoresistor

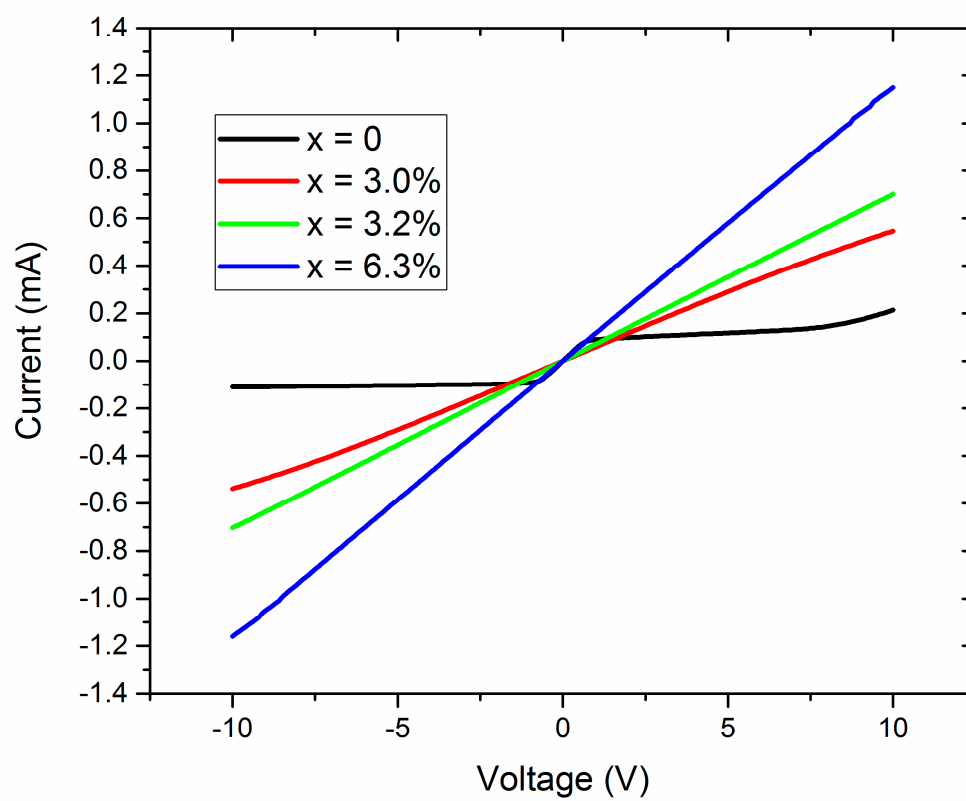

**Figure S2.** Current-voltage characteristics of fabricated photoresistors
